# Supplementary material
Source: publisher figshare collection journal article supplement (https://tandf.figshare.com/ndownloader/files/15451391)
Supplement: Supplementary file 1 [file 15451391]

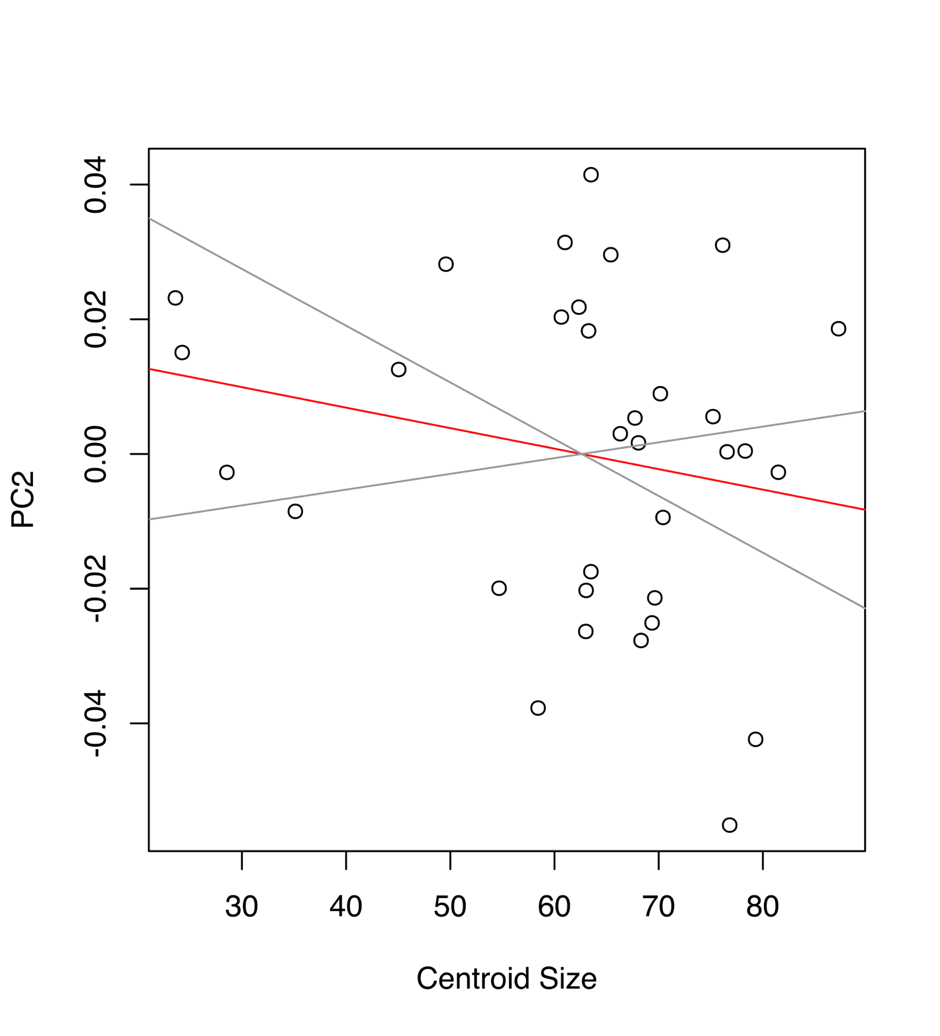


**Supplementary Figure 1.** Major axis regression of PC2 against centroid size. The relationship is not significant (R2 = 0.04, p = 0.134).
